# Supplementary material
Source: Springer Nature journal article supplement (https://www.springermedizin.de/resource/supplementary/12879_2007_700_MOESM1_ESM.pdf/9449190)

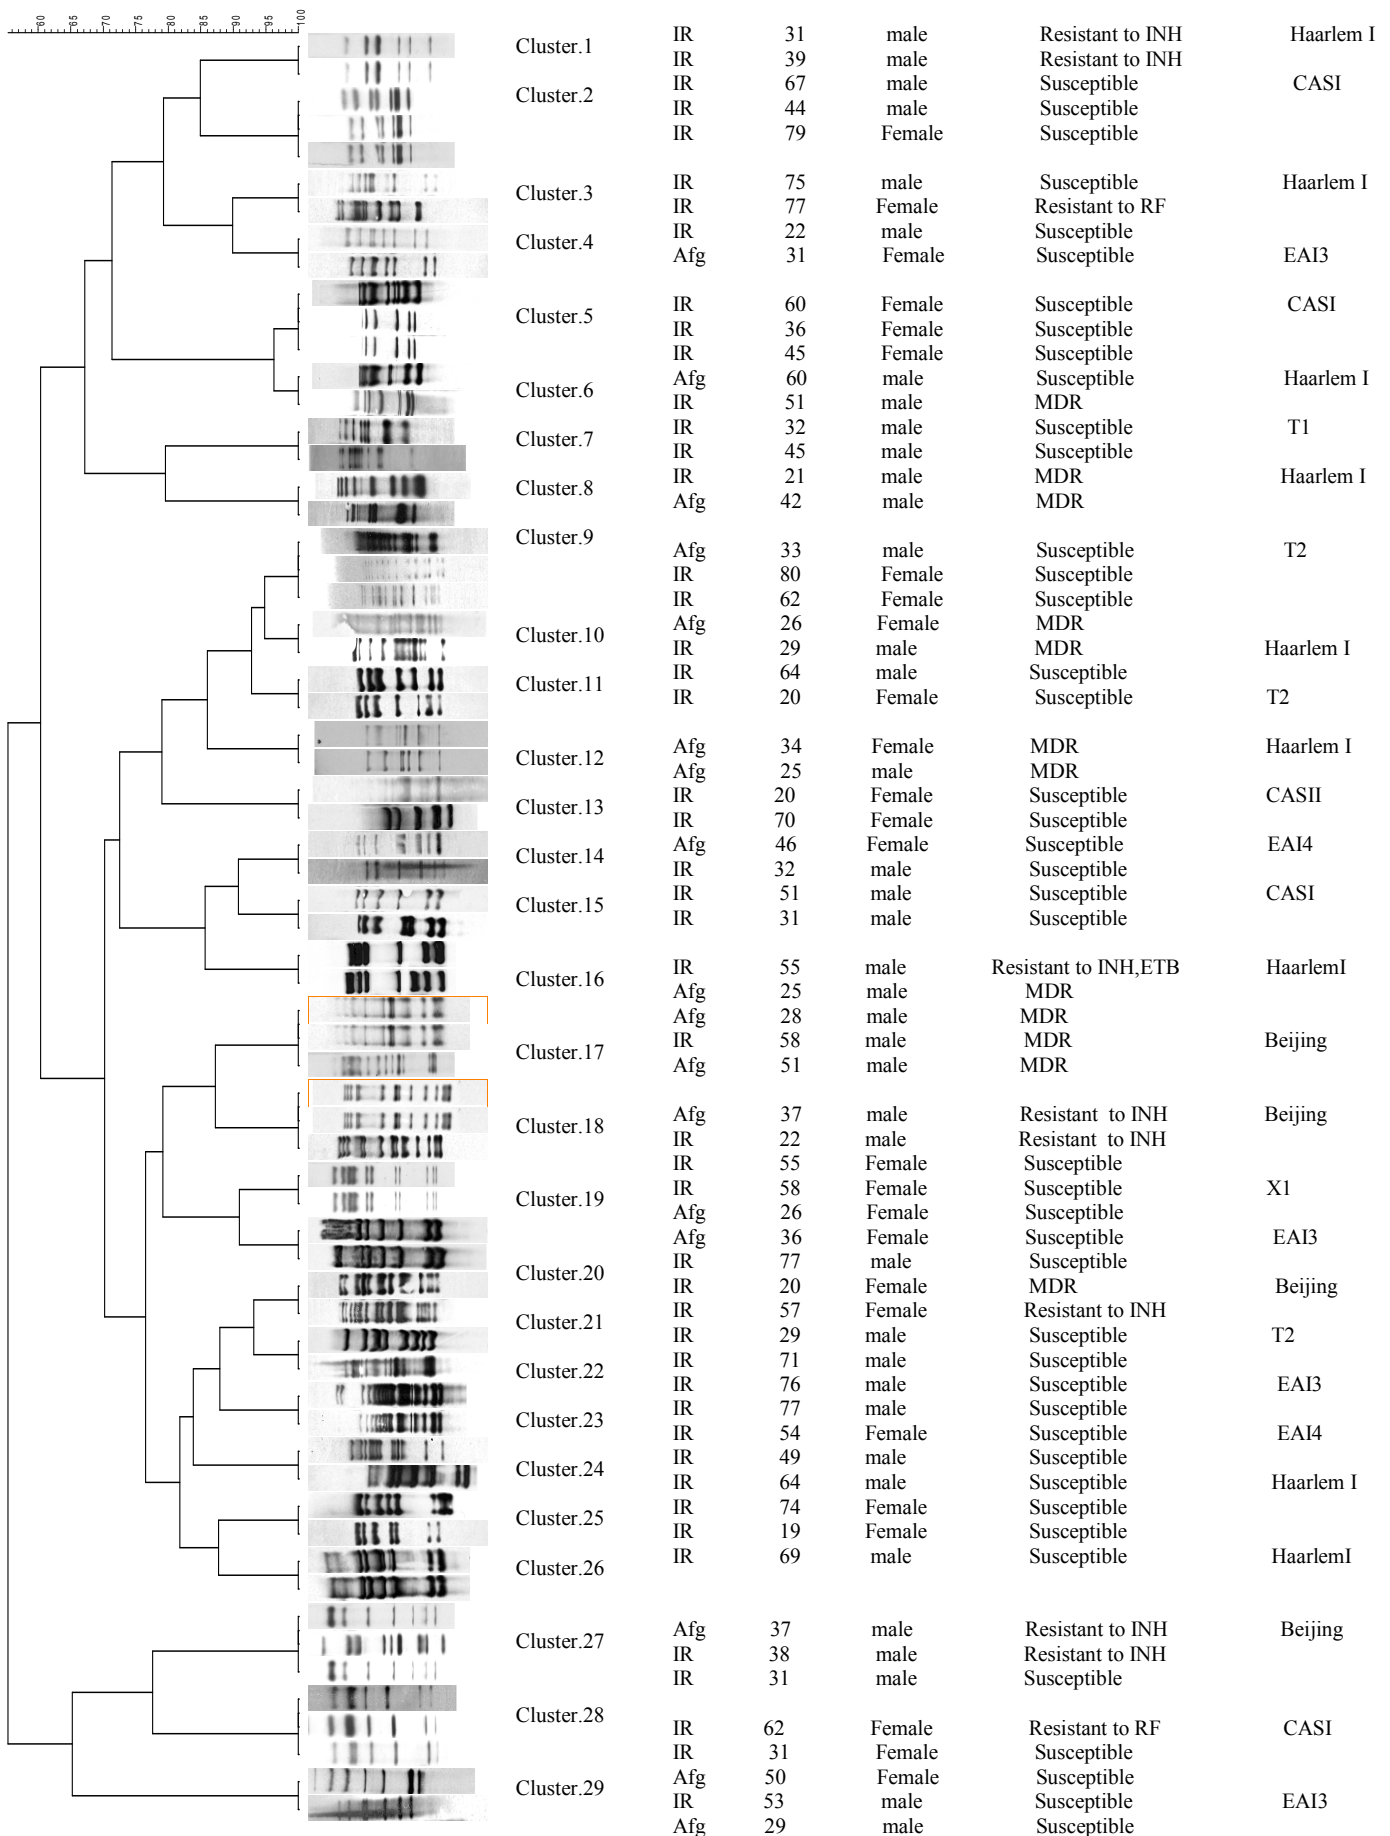

Supplement: MOESM1 [file 9449190]
